# Supplementary material for: Mitochondrial Stress Links Environmental Triggers with Pro-Inflammatory Signaling in Crohn’s Disease
Source: MDPI journal article supplement (doi:10.3390/antiox12122105), 2023-12-13
Supplement: s1 [file s1]

Replicate\_1  
(07-03-2022)

M (dual color)  
M (all blue)

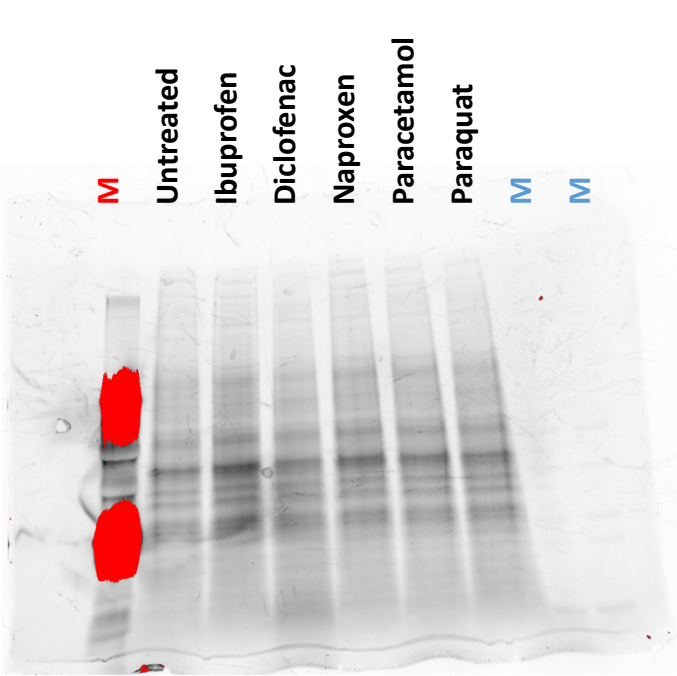

Stain-free image

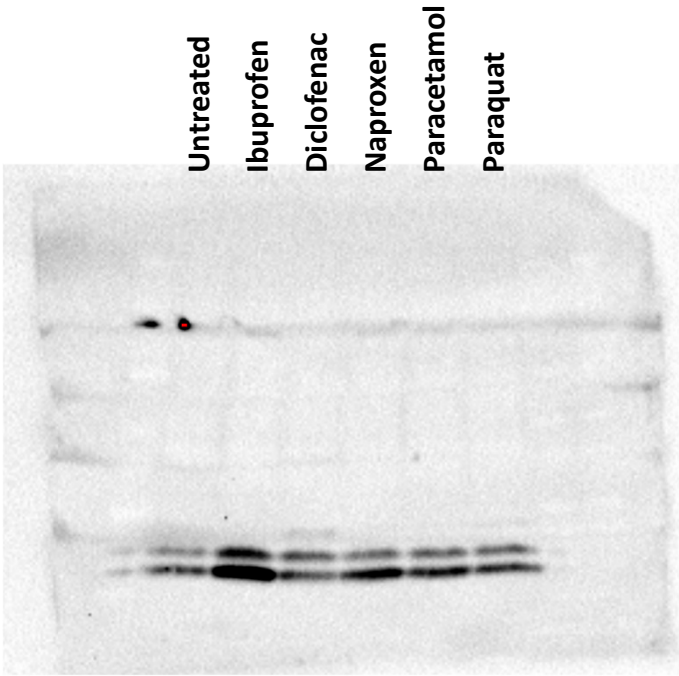

anti-LC3B image

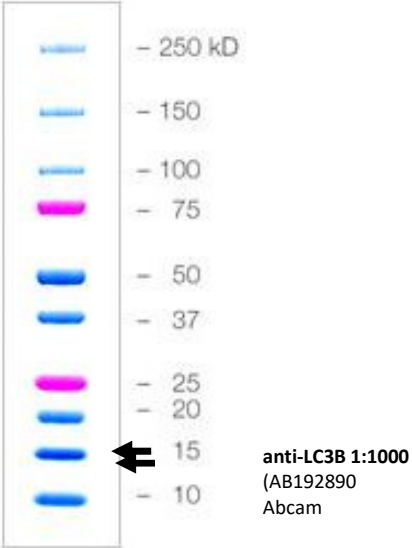

Replicate\_2  
(21-07-2022)

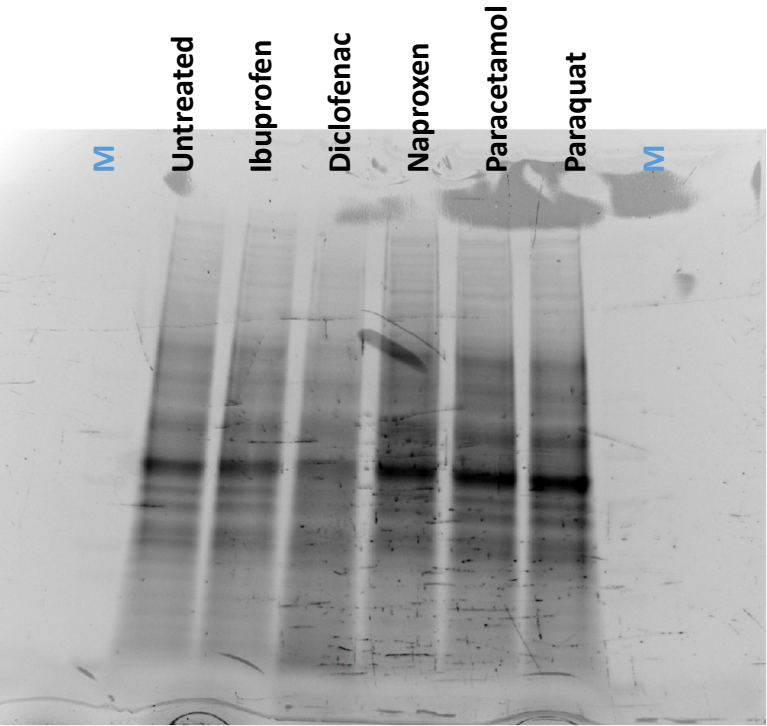

Stain-free image

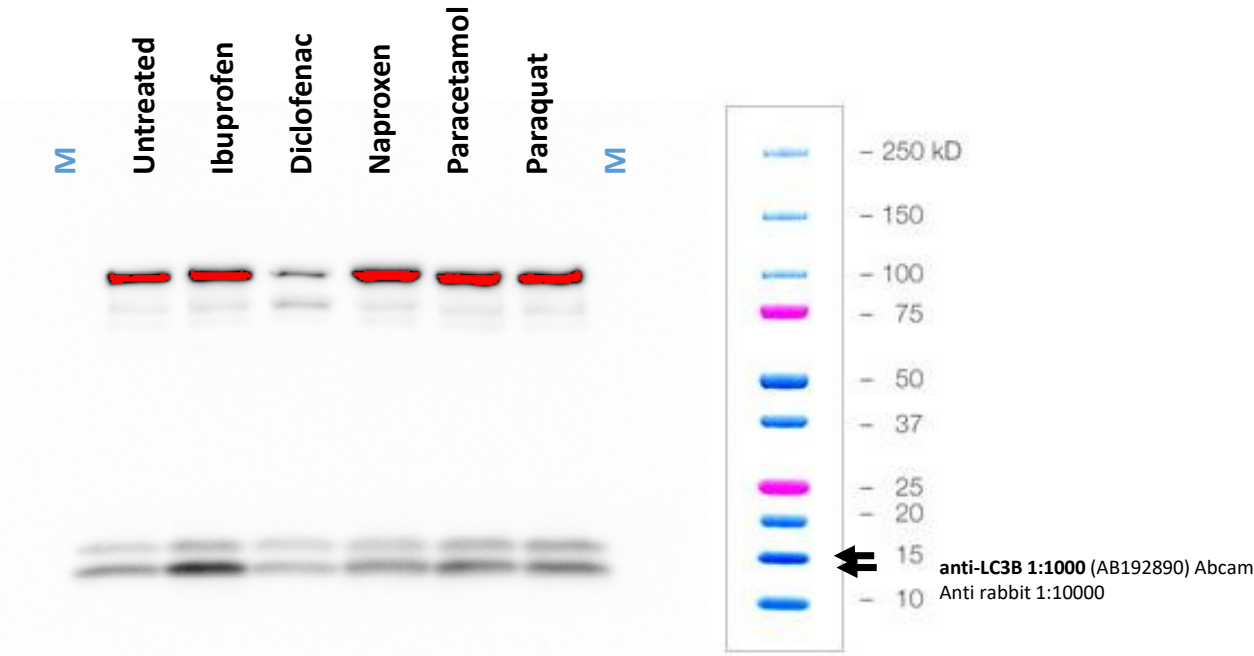

anti-LC3B image

Replicate\_3  
(09-01-2023)

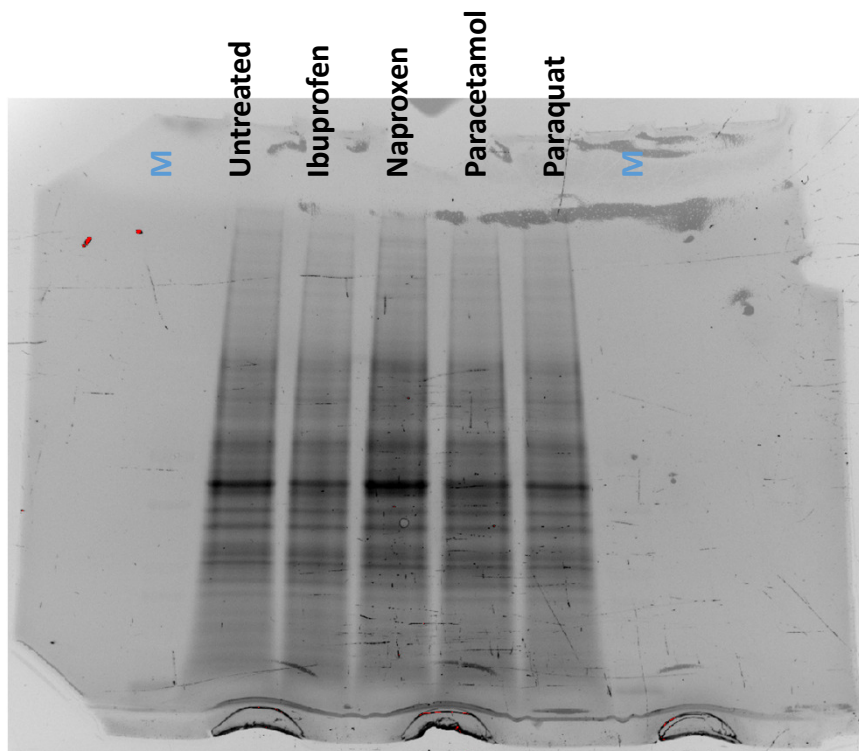

Stain-free image

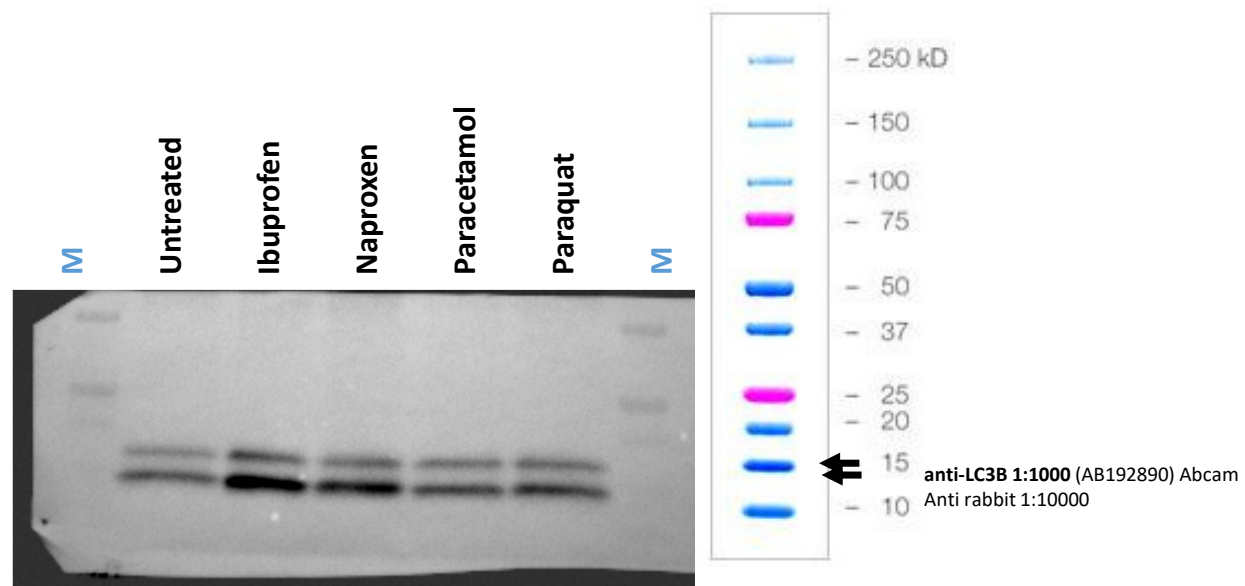

anti-LC3B image

Replicate\_4  
(27-11-2023)

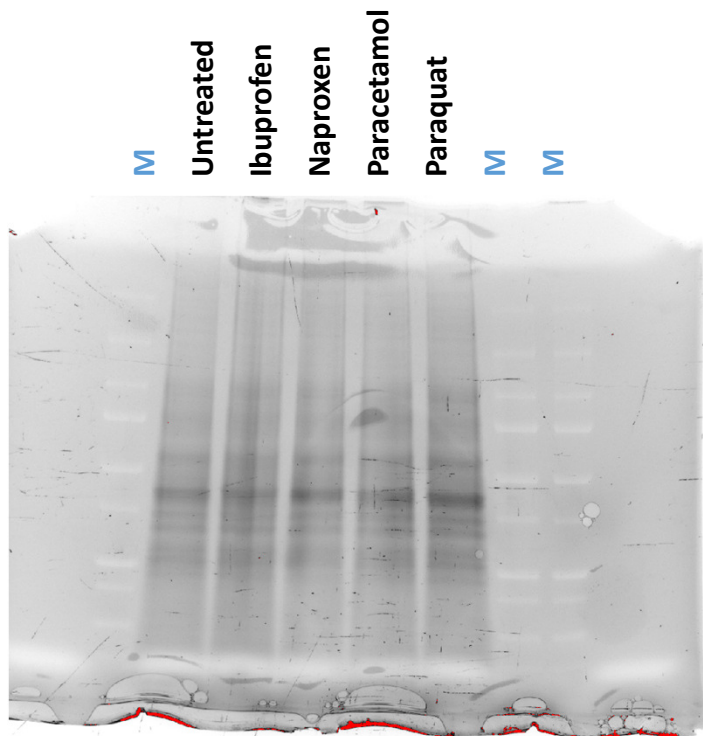

M (all blue) BioRad

Stain-free image

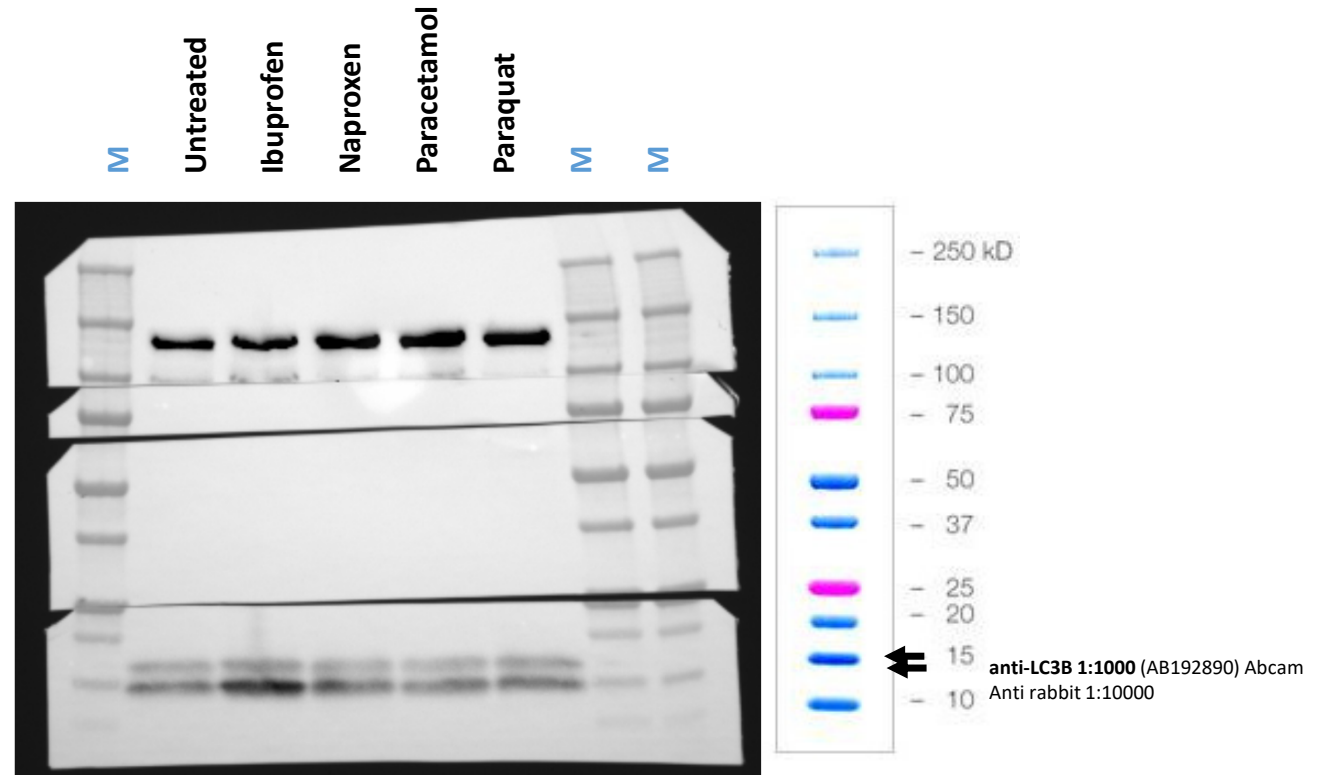

anti-LC3B image
