# Supplementary material for: Mitochondrial Stress Links Environmental Triggers with Pro-Inflammatory Signaling in Crohn’s Disease
Source: MDPI journal article supplement (doi:10.3390/antiox12122105), 2023-12-13
Supplement: s1 [file s1]

**Table S1.** Demographic characteristic of subjects participating in the study. For gender, number of individuals from each gender and percentage is represented. For age at colonoscopy and disease duration, median and interquartile range (IQR, P25-P75) is represented. No significant difference was observed between different groups.

| Baseline characteristics              | Colonic organoids  |              |
|---------------------------------------|--------------------|--------------|
|                                       | HC                 | CD           |
| Male/Female (%)                       | 0/4 (0/100)        | 0/5 (0/100%) |
| Median (IQR) age at endoscopy (years) | 48.5 (46.25-50.25) | 42 (34-55)   |
| Median (IQR) disease duration (years) | N/A                | 10 (3-11)    |

A. Demographic characteristics of subjects from whom colonic organoids were developed and used in the study.

| Baseline characteristics              | Healthy donors  | Crohn's disease |                          |                    |
|---------------------------------------|-----------------|-----------------|--------------------------|--------------------|
|                                       |                 | Remission       | Low-to-moderate activity | Severe activity    |
| Male/Female (%)                       | 5/4 (55.6/44.4) | 3/2 (60.0/40.0) | 4/4 (50.0/50.0)          | 1/3 (25.0/75.0)    |
| Median (IQR) age at endoscopy (years) | 42.0 (32-52)    | 34 (33-46)      | 44 (39.75-46.5)          | 37.5 (29.25-46.25) |
| Median (IQR) disease duration (years) |                 | 10 (0-24)       | 4.5 (0-14)               | 9 (1.5-17.5)       |

B. Demographic characteristic of subjects from whom colonic biopsies were used in the study.

Table S2: Primers used for quantification of gene expression. Primer sequences (forward and reverse) for genes used in this study are represented in 5' → 3' direction. Main function is indicated.

Supplemental table 2. Primers used for RT-qPCR assays.

| Gene  | Forward (5' → 3')    | Reverse (5' → 3')      | Function                              |
|-------|----------------------|------------------------|---------------------------------------|
| S18   | AGAGAATTTGCCCTCCGACT | AACACTGGATTCCACCTTGG   | Housekeeping                          |
| ATF4  | TCAAACCTCATGGGTTCTCC | GTGTCATCCAACGTGGTCAG   | UPR <sup>mt</sup>                     |
| ATF5  | TGGATCTCCTCCCTCCTTT  | GCTCTATCCTGTCGCCACTC   | UPR <sup>mt</sup>                     |
| CHOP  | TGGAAGCCTGGTATGAGGAC | TGTGACCTCTGCTGGTTCTG   | UPR <sup>mt</sup>                     |
| GDF15 | CTCCAGATTCCGAGAGTTGC | AGAGATACGCAGGTGCAGGT   | Mitokine                              |
| FGF21 | ACTCCAGTCCTCTCCTGCAA | ATCCTCCCTGATCTCCAGGT   | Mitokine                              |
| PGC1α | CACCAGCCAACACTCAGCTA | GTGTGAGGAGGGTCATCGTT   | Mitochondrial biogenesis              |
| TRAP1 | ATCCACCTGAAATCCGACTG | GCGACGTAGCGGTAGAACTC   | Mitochondrial chaperone               |
| LON   | CGGGAAGATCATCCAGTGTT | ACGTCCAGGTAGTGGTCCAG   | Mitochondrial protease                |
| DRP1  | GTGAACCCGTGGATGATAAA | GAAACCTCAGGCACAAATAAAG | Mitochondrial fission                 |
| FIS1  | AGCGGGATTACGTCTTCTA  | CCACGAGTCCATCTTTCTTC   | Mitochondrial fission                 |
| OPA1  | GCCACTTCTGGGTCATTCC  | CTGGCAGACCTCACAGGC     | Mitochondrial fusion                  |
| NF-κB | CCTGGATGACTCTTGGGAAA | TCAGCCAGCTGTTTCATGTC   | Pro-inflammatory transcription factor |
| OAS1  | CGAAACCAACAGCAGTCCAA | TGGTTGATTTGCATGCGGAA   | IFN pathway                           |
| STAT1 | TGCAAAACCTTGCAAGACAG | GGGCATTCTGGGTAAAGTTCA  | IFN pathway                           |

Table S3: Correlation between expression of assessed genes in colonic biopsies. For each pair of genes, Pearson's R and p value (two tails) are shown. Color scale from red to green represents degree of correlation (red indicates Pearson's r closer to 1 and green indicates Pearson's r closer to 0).

|               |             | ATF4   | ATF5   | CHOP   | GDF15  | FGF21  | PGC1 $\alpha$ | TRAP1  | DRP1   | FIS1   | OPA1   | NFKB   | OAS1   | STAT1  |
|---------------|-------------|--------|--------|--------|--------|--------|---------------|--------|--------|--------|--------|--------|--------|--------|
| ATF4          | Pearson's r |        | 0.804  | 0.655  | 0.278  | 0.4    | 0.036         | 0.299  | 0.246  | 0.509  | 0.479  | 0.176  | 0.341  | 0.253  |
|               | p value     |        | <0.001 | <0.001 | 0.169  | 0.08   | 0.862         | 0.138  | 0.227  | 0.008  | 0.013  | 0.39   | 0.088  | 0.212  |
| ATF5          | Pearson's r | 0.804  |        | 0.514  | -0.045 | 0.279  | -0.048        | 0.24   | 0.373  | 0.709  | 0.56   | 0.488  | 0.257  | 0.417  |
|               | p value     | <0.001 |        | 0.007  | 0.828  | 0.234  | 0.816         | 0.238  | 0.06   | <0.001 | 0.003  | 0.011  | 0.205  | 0.034  |
| CHOP          | Pearson's r | 0.655  | 0.514  |        | 0.225  | 0.197  | 0.167         | 0.229  | 0.343  | 0.475  | 0.442  | 0.224  | 0.107  | 0.136  |
|               | p value     | <0.001 | 0.007  |        | 0.27   | 0.405  | 0.416         | 0.261  | 0.086  | 0.014  | 0.024  | 0.271  | 0.601  | 0.508  |
| GDF15         | Pearson's r | 0.278  | -0.045 | 0.225  |        | -0.076 | -0.099        | 0.155  | -0.14  | 0.102  | -0.069 | -0.245 | -0.028 | -0.037 |
|               | p value     | 0.169  | 0.828  | 0.27   |        | 0.75   | 0.63          | 0.449  | 0.494  | 0.621  | 0.736  | 0.228  | 0.892  | 0.856  |
| FGF21         | Pearson's r | 0.4    | 0.279  | 0.197  | -0.076 |        | -0.217        | -0.179 | -0.115 | 0.314  | -0.058 | -0.11  | 0.123  | 0.065  |
|               | p value     | 0.08   | 0.234  | 0.405  | 0.75   |        | 0.359         | 0.45   | 0.63   | 0.177  | 0.809  | 0.646  | 0.604  | 0.785  |
| PGC1 $\alpha$ | Pearson's r | 0.036  | -0.048 | 0.167  | -0.099 | -0.217 |               | 0.418  | 0.523  | -0.04  | 0.479  | 0.437  | 0.428  | -0.002 |
|               | p value     | 0.862  | 0.816  | 0.416  | 0.63   | 0.359  |               | 0.034  | 0.006  | 0.847  | 0.013  | 0.026  | 0.029  | 0.993  |
| TRAP1         | Pearson's r | 0.299  | 0.24   | 0.229  | 0.155  | -0.179 | 0.418         |        | 0.44   | 0.316  | 0.305  | 0.375  | 0.633  | 0.62   |
|               | p value     | 0.138  | 0.238  | 0.261  | 0.449  | 0.45   | 0.034         |        | 0.024  | 0.116  | 0.13   | 0.059  | 0.001  | 0.001  |
| DRP1          | Pearson's r | 0.246  | 0.373  | 0.343  | -0.14  | -0.115 | 0.523         | 0.44   |        | 0.286  | 0.538  | 0.629  | 0.336  | 0.394  |
|               | p value     | 0.227  | 0.06   | 0.086  | 0.494  | 0.63   | 0.006         | 0.024  |        | 0.156  | 0.005  | 0.001  | 0.094  | 0.046  |
| FIS1          | Pearson's r | 0.509  | 0.709  | 0.475  | 0.102  | 0.314  | -0.04         | 0.316  | 0.286  |        | 0.388  | 0.265  | 0.127  | 0.374  |
|               | p value     | 0.008  | <0.001 | 0.014  | 0.621  | 0.177  | 0.847         | 0.116  | 0.156  |        | 0.05   | 0.191  | 0.536  | 0.06   |
| OPA1          | Pearson's r | 0.479  | 0.56   | 0.442  | -0.069 | -0.058 | 0.479         | 0.305  | 0.538  | 0.388  |        | 0.41   | 0.424  | 0.266  |
|               | p value     | 0.013  | 0.003  | 0.024  | 0.736  | 0.809  | 0.013         | 0.13   | 0.005  | 0.05   |        | 0.038  | 0.031  | 0.188  |
| NFKB          | Pearson's r | 0.176  | 0.488  | 0.224  | -0.245 | -0.11  | 0.437         | 0.375  | 0.629  | 0.265  | 0.41   |        | 0.305  | 0.423  |
|               | p value     | 0.39   | 0.011  | 0.271  | 0.228  | 0.646  | 0.026         | 0.059  | 0.001  | 0.191  | 0.038  |        | 0.129  | 0.031  |
| OAS1          | Pearson's r | 0.341  | 0.257  | 0.107  | -0.028 | 0.123  | 0.428         | 0.633  | 0.336  | 0.127  | 0.424  | 0.305  |        | 0.404  |
|               | p value     | 0.088  | 0.205  | 0.601  | 0.892  | 0.604  | 0.029         | 0.001  | 0.094  | 0.536  | 0.031  | 0.129  |        | 0.04   |
| STAT1         | Pearson's r | 0.253  | 0.417  | 0.136  | -0.037 | 0.065  | -0.002        | 0.62   | 0.394  | 0.374  | 0.266  | 0.423  | 0.404  |        |
|               | p value     | 0.212  | 0.034  | 0.508  | 0.856  | 0.785  | 0.993         | 0.001  | 0.046  | 0.06   | 0.188  | 0.031  | 0.04   |        |

|               |                        | ATF4   | ATF5   | CHOP   | GDF15  | FGF21  | PGC1 $\alpha$ | TRAP1  | DRP1   | FIS1   | OPA1   | NF $\kappa$ B | OAS1   | STAT1  |
|---------------|------------------------|--------|--------|--------|--------|--------|---------------|--------|--------|--------|--------|---------------|--------|--------|
| ATF4          | Correlación de Pearson |        | 0.804  | 0.655  | 0.278  | 0.400  | 0.036         | 0.299  | 0.246  | 0.509  | 0.479  | 0.176         | 0.341  | 0.253  |
|               | Sig. (bilateral)       |        | <0.001 | <0.001 | 0.169  | 0.080  | 0.862         | 0.138  | 0.227  | 0.008  | 0.013  | 0.390         | 0.088  | 0.212  |
| ATF5          | Correlación de Pearson | 0.804  |        | 0.514  | -0.045 | 0.279  | -0.048        | 0.240  | 0.373  | 0.709  | 0.560  | 0.488         | 0.257  | 0.417  |
|               | Sig. (bilateral)       | <0.001 |        | 0.007  | 0.828  | 0.234  | 0.816         | 0.238  | 0.060  | <0.001 | 0.003  | 0.011         | 0.205  | 0.034  |
| CHOP          | Correlación de Pearson | 0.655  | 0.514  |        | 0.225  | 0.197  | 0.167         | 0.229  | 0.343  | 0.475  | 0.442  | 0.224         | 0.107  | 0.136  |
|               | Sig. (bilateral)       | <0.001 | 0.007  |        | 0.270  | 0.405  | 0.416         | 0.261  | 0.086  | 0.014  | 0.024  | 0.271         | 0.601  | 0.508  |
| GDF15         | Correlación de Pearson | 0.278  | -0.045 | 0.225  |        | -0.076 | -0.099        | 0.155  | -0.140 | 0.102  | -0.069 | -0.245        | -0.028 | -0.037 |
|               | Sig. (bilateral)       | 0.169  | 0.828  | 0.270  |        | 0.750  | 0.630         | 0.449  | 0.494  | 0.621  | 0.736  | 0.228         | 0.892  | 0.856  |
| FGF21         | Correlación de Pearson | 0.400  | 0.279  | 0.197  | -0.076 |        | -0.217        | -0.179 | -0.115 | 0.314  | -0.058 | -0.110        | 0.123  | 0.065  |
|               | Sig. (bilateral)       | 0.080  | 0.234  | 0.405  | 0.750  |        | 0.359         | 0.450  | 0.630  | 0.177  | 0.809  | 0.646         | 0.604  | 0.785  |
| PGC1 $\alpha$ | Correlación de Pearson | 0.036  | -0.048 | 0.167  | -0.099 | -0.217 |               | 0.418  | 0.523  | -0.040 | 0.479  | 0.437         | 0.428  | -0.002 |
|               | Sig. (bilateral)       | 0.862  | 0.816  | 0.416  | 0.630  | 0.359  |               | 0.034  | 0.006  | 0.847  | 0.013  | 0.026         | 0.029  | 0.993  |
| TRAP1         | Correlación de Pearson | 0.299  | 0.240  | 0.229  | 0.155  | -0.179 | 0.418         |        | 0.440  | 0.316  | 0.305  | 0.375         | 0.633  | 0.620  |
|               | Sig. (bilateral)       | 0.138  | 0.238  | 0.261  | 0.449  | 0.450  | 0.034         |        | 0.024  | 0.116  | 0.130  | 0.059         | 0.001  | 0.001  |
| DRP1          | Correlación de Pearson | 0.246  | 0.373  | 0.343  | -0.140 | -0.115 | 0.523         | 0.440  |        | 0.286  | 0.538  | 0.629         | 0.336  | 0.394  |

|       |                           |       |        |       |        |        |        |       |       |       |       |       |       |       |
|-------|---------------------------|-------|--------|-------|--------|--------|--------|-------|-------|-------|-------|-------|-------|-------|
|       | Sig.<br>(bilateral)       | 0.227 | 0.060  | 0.086 | 0.494  | 0.630  | 0.006  | 0.024 |       | 0.156 | 0.005 | 0.001 | 0.094 | 0.046 |
| FIS1  | Correlación<br>de Pearson | 0.509 | 0.709  | 0.475 | 0.102  | 0.314  | -0.040 | 0.316 | 0.286 |       | 0.388 | 0.265 | 0.127 | 0.374 |
|       | Sig.<br>(bilateral)       | 0.008 | <0.001 | 0.014 | 0.621  | 0.177  | 0.847  | 0.116 | 0.156 |       | 0.050 | 0.191 | 0.536 | 0.060 |
| OPA1  | Correlación<br>de Pearson | 0.479 | 0.560  | 0.442 | -0.069 | -0.058 | 0.479  | 0.305 | 0.538 | 0.388 |       | 0.410 | 0.424 | 0.266 |
|       | Sig.<br>(bilateral)       | 0.013 | 0.003  | 0.024 | 0.736  | 0.809  | 0.013  | 0.130 | 0.005 | 0.050 |       | 0.038 | 0.031 | 0.188 |
| NFkB  | Correlación<br>de Pearson | 0.176 | 0.488  | 0.224 | -0.245 | -0.110 | 0.437  | 0.375 | 0.629 | 0.265 | 0.410 |       | 0.305 | 0.423 |
|       | Sig.<br>(bilateral)       | 0.390 | 0.011  | 0.271 | 0.228  | 0.646  | 0.026  | 0.059 | 0.001 | 0.191 | 0.038 |       | 0.129 | 0.031 |
| OAS1  | Correlación<br>de Pearson | 0.341 | 0.257  | 0.107 | -0.028 | 0.123  | 0.428  | 0.633 | 0.336 | 0.127 | 0.424 | 0.305 |       | 0.404 |
|       | Sig.<br>(bilateral)       | 0.088 | 0.205  | 0.601 | 0.892  | 0.604  | 0.029  | 0.001 | 0.094 | 0.536 | 0.031 | 0.129 |       | 0.040 |
| STAT1 | Correlación<br>de Pearson | 0.253 | 0.417  | 0.136 | -0.037 | 0.065  | -0.002 | 0.620 | 0.394 | 0.374 | 0.266 | 0.423 | 0.404 |       |
|       | Sig.<br>(bilateral)       | 0.212 | 0.034  | 0.508 | 0.856  | 0.785  | 0.993  | 0.001 | 0.046 | 0.060 | 0.188 | 0.031 | 0.040 |       |
